# Supplementary material for: Clarifying regional hydrologic controls of the Marañón River, Peru through rapid assessment to inform system-wide basin planning approaches
Source: Oxford University Press journal article supplement (doi:10.1525/elementa.290), 2018-01-01
Supplement: elementa-6-290-s2.pdf [file elementa-6-290-s2.pdf]

**Table S1: Sampled sub-basin topographic, climatic and geologic attributes<sup>a</sup>**

| Sub-basin  | Drainage area (km <sup>2</sup> ) | Elevation zone (Figure 1) | Minimum elevation (m ASL) | Maximum elevation (m ASL) | Mean elevation (m ASL) | Mean slope (degrees) | Mean snow probability | Average July (dry season) precipitation (mm) | Average March (wet season) precipitation (mm) | Average annual precipitation (mm) | Dominant geologies <sup>b,c,d</sup>                   |
|------------|----------------------------------|---------------------------|---------------------------|---------------------------|------------------------|----------------------|-----------------------|----------------------------------------------|-----------------------------------------------|-----------------------------------|-------------------------------------------------------|
| Headwaters | 6160                             | Alpine                    | 2204                      | 6418                      | 4032                   | 18.5                 | 5%                    | 10                                           | 143                                           | 750                               | Precambrian basement (Maranon complex)                |
|            |                                  |                           |                           |                           |                        |                      |                       |                                              |                                               |                                   | Early Cretaceous continental deposits                 |
|            |                                  |                           |                           |                           |                        |                      |                       |                                              |                                               |                                   | Early-Late Cretaceous marine deposits                 |
| Putchka    | 2673                             | Alpine                    | 2126                      | 6258                      | 3994                   | 22.9                 | 5%                    | 6                                            | 138                                           | 783                               | Late Jurassic marine deposits (Chicama)               |
|            |                                  |                           |                           |                           |                        |                      |                       |                                              |                                               |                                   | Early Cretaceous continental deposits                 |
|            |                                  |                           |                           |                           |                        |                      |                       |                                              |                                               |                                   | Early-Late Cretaceous marine deposits                 |
| Yanomayo   | 2168                             | Alpine                    | 1974                      | 6243                      | 3846                   | 22.3                 | 11%                   | 5                                            | 132                                           | 748                               | Early Cretaceous continental deposits                 |
|            |                                  |                           |                           |                           |                        |                      |                       |                                              |                                               |                                   | Early-Late Cretaceous marine deposits                 |
|            |                                  |                           |                           |                           |                        |                      |                       |                                              |                                               |                                   | Late Jurassic marine deposits (Chicama)               |
| Rupac      | 926                              | Alpine                    | 1764                      | 4584                      | 3498                   | 21.3                 | 0%                    | 7                                            | 116                                           | 665                               | Early Cretaceous continental deposits                 |
|            |                                  |                           |                           |                           |                        |                      |                       |                                              |                                               |                                   | Late Triassic-Early Jurassic marine deposits (Pucara) |
|            |                                  |                           |                           |                           |                        |                      |                       |                                              |                                               |                                   | Late Jurassic marine deposits (Chicama)               |
| Actuy      | 438                              | Alpine                    | 1668                      | 4672                      | 3638                   | 21.9                 | 0%                    | 10                                           | 139                                           | 798                               | Early Carboniferous continental deposits              |
|            |                                  |                           |                           |                           |                        |                      |                       |                                              |                                               |                                   | Precambrian basement (Maranon complex)                |
|            |                                  |                           |                           |                           |                        |                      |                       |                                              |                                               |                                   | Early Carboniferous continental deposits              |
| Cajas      | 719                              | Alpine                    | 1595                      | 4696                      | 3545                   | 23.1                 | 8%                    | 15                                           | 146                                           | 901                               | Early Paleozoic granodiorite/granite                  |
|            |                                  |                           |                           |                           |                        |                      |                       |                                              |                                               |                                   | Precambrian basement (Maranon complex)                |
|            |                                  |                           |                           |                           |                        |                      |                       |                                              |                                               |                                   | Early Carboniferous continental deposits              |
| San Miguel | 455                              | Transition                | 1302                      | 4579                      | 3386                   | 26.3                 | 15%                   | 19                                           | 162                                           | 997                               | Late Triassic-Early Jurassic marine deposits (Pucara) |
|            |                                  |                           |                           |                           |                        |                      |                       |                                              |                                               |                                   | Late Jurassic marine deposits (Chicama)               |
|            |                                  |                           |                           |                           |                        |                      |                       |                                              |                                               |                                   | Early Cretaceous continental deposits                 |
| Chusgon    | 1267                             | Transition                | 1083                      | 4667                      | 3206                   | 21.1                 | 0%                    | 17                                           | 167                                           | 982                               | Early-Late Cretaceous marine deposits                 |
|            |                                  |                           |                           |                           |                        |                      |                       |                                              |                                               |                                   | Late Jurassic marine deposits (Chicama)               |
|            |                                  |                           |                           |                           |                        |                      |                       |                                              |                                               |                                   | Early Cretaceous continental deposits                 |
| Crisnejas  | 4693                             | Transition                | 1002                      | 4702                      | 3118                   | 15.7                 | 0%                    | 16                                           | 160                                           | 939                               | Early-Late Cretaceous marine deposits                 |
|            |                                  |                           |                           |                           |                        |                      |                       |                                              |                                               |                                   | Early Cretaceous continental deposits                 |
|            |                                  |                           |                           |                           |                        |                      |                       |                                              |                                               |                                   | Early-Late Cretaceous marine deposits                 |
| Yangas     | 1188                             | Transition                | 768                       | 4250                      | 2993                   | 18.8                 | 1%                    | 28                                           | 154                                           | 1022                              | Early Cretaceous continental deposits                 |
|            |                                  |                           |                           |                           |                        |                      |                       |                                              |                                               |                                   | Early-Late Cretaceous marine deposits                 |
|            |                                  |                           |                           |                           |                        |                      |                       |                                              |                                               |                                   | Precambrian basement (Maranon complex)                |
| Shauve     | 110                              | Transition                | 737                       | 3811                      | 2213                   | 25.6                 | 8%                    | 28                                           | 119                                           | 819                               | Neogene Quaternary continental deposits               |
|            |                                  |                           |                           |                           |                        |                      |                       |                                              |                                               |                                   | Early Cretaceous continental deposits                 |
|            |                                  |                           |                           |                           |                        |                      |                       |                                              |                                               |                                   | Early-Late Cretaceous marine deposits                 |
| Silaco     | 2433                             | Transition                | 520                       | 4232                      | 2800                   | 17.8                 | 2%                    | 30                                           | 141                                           | 978                               | Early-Late Cretaceous marine deposits                 |
|            |                                  |                           |                           |                           |                        |                      |                       |                                              |                                               |                                   | Late Jurassic marine deposits (Chicama)               |
|            |                                  |                           |                           |                           |                        |                      |                       |                                              |                                               |                                   | Late Triassic-Early Jurassic marine deposits (Pucara) |
| Chamaya    | 7730                             | Jungle                    | 425                       | 4049                      | 2202                   | 21.1                 | 7%                    | 28                                           | 138                                           | 811                               | Early Cretaceous continental deposits                 |
|            |                                  |                           |                           |                           |                        |                      |                       |                                              |                                               |                                   | Late Jurassic marine deposits (Chicama)               |
|            |                                  |                           |                           |                           |                        |                      |                       |                                              |                                               |                                   | Late Triassic-Early Jurassic marine deposits (Pucara) |
| Chinchi    | 7812                             | Jungle                    | 353                       | 3934                      | 1692                   | 20.1                 | 20%                   | 63                                           | 165                                           | 1199                              | Neogene Quaternary continental deposits               |
|            |                                  |                           |                           |                           |                        |                      |                       |                                              |                                               |                                   | Neogene Pliocene volcanics                            |
|            |                                  |                           |                           |                           |                        |                      |                       |                                              |                                               |                                   | Precambrian basement (Maranon complex)                |
|            |                                  |                           |                           |                           |                        |                      |                       |                                              |                                               |                                   | Early Cretaceous continental deposits                 |
|            |                                  |                           |                           |                           |                        |                      |                       |                                              |                                               |                                   | Early-Late Cretaceous marine deposits                 |
|            |                                  |                           |                           |                           |                        |                      |                       |                                              |                                               |                                   | Early-Late Cretaceous marine deposits                 |

<sup>a</sup>Geology classifications derived from 1:100,000 scale Peruvian Geology map (INGEMMET, 1999).

<sup>b</sup>Continental deposits generally refer to clastic sediments (sandstones, river conglomerate facies, soils).

<sup>c</sup>Marine sediments typical include limestones and calcium carbonate sedimentary formations, with some clastics.

<sup>d</sup>The Maranon complex is highly metamorphosed at deep levels and thus can be highly crystalline.
