# Supplementary material for: Clarifying regional hydrologic controls of the Marañón River, Peru through rapid assessment to inform system-wide basin planning approaches
Source: Oxford University Press journal article supplement (doi:10.1525/elementa.290), 2018-01-01
Supplement: elementa-6-290-s3.pdf [file elementa-6-290-s3.pdf]

**Table S2: Water chemistry and isotopic data, water sample meta data and mixing model components**

| Sample ID | Sample description, mixing model end member roles              | Sample elevation (m) | River distance (km) | Elevation zone (Fig. 2) | Discharge $m^3 s^{-1}$      | Latitude   | Longitude   | all ion concentrations in $\mu Eq L^{-1}$ |                |                  |                 |                 |                               |                  |        |      |      |      | ppb          |          |                |            | $\mu S L^{-1}$ |  | parts per mil |  |
|-----------|----------------------------------------------------------------|----------------------|---------------------|-------------------------|-----------------------------|------------|-------------|-------------------------------------------|----------------|------------------|-----------------|-----------------|-------------------------------|------------------|--------|------|------|------|--------------|----------|----------------|------------|----------------|--|---------------|--|
|           |                                                                |                      |                     |                         |                             |            |             | Ca <sup>2+</sup>                          | K <sup>+</sup> | Mg <sup>2+</sup> | Na <sup>+</sup> | Cl <sup>-</sup> | SO <sub>4</sub> <sup>2-</sup> | ANC              | Si     | Cu   | Fe   | pH   | conductivity | D excess | $\delta^{18}O$ | $\delta D$ |                |  |               |  |
| 7/17/15   | Upstream Putchka                                               | 2302                 | 0                   | Alpine                  |                             | -9.073493° | -76.938222° | 1701.0                                    | 18.4           | 595.4            | 137.5           | 63.3            | 404.8                         | 1991.9           | 3001.0 | 0.14 | 681  | 7.75 | 242.1        | 6.65     | -13.87         | -104.28    |                |  |               |  |
| 7/17/15   | Putchka tributary                                              | 2186                 | 2                   | Alpine                  | 44                          | -9.078115° | -76.945142° | 1946.5                                    | 30.1           | 796.1            | 262.7           | 244.4           | 1388.6                        | 1481.6           | 2999.8 | 0.65 | 758  | 7.53 | 326.4        | 8.09     | -14.67         | -109.26    |                |  |               |  |
| 7/18/15   | Downstream Putchka, upstream Yanomayo                          | 1938                 | 39                  | Alpine                  | 81                          | -8.895251° | -77.149132° | 1739.7                                    | 24.5           | 690.5            | 188.4           | 129.0           | 747.0                         | 1758.8           | 3098.5 | 0.38 | 695  | 7.75 | 270.3        | 7.11     | -14.11         | -105.79    |                |  |               |  |
| 7/18/15   | Yanomayo tributary                                             | 1937                 | 40.5                | Alpine                  | 36                          | -8.902606° | -77.161485° | 868.9                                     | 18.6           | 564.4            | 134.6           | 47.2            | 871.9                         | 764.8            | 2813.1 | 0.20 | 330  | 7.44 | 169.8        | 9.65     | -14.39         | -105.49    |                |  |               |  |
| 7/20/15   | Downstream Yanomayo, Upstream Huaylas                          | 1872                 | 58                  | Alpine                  | 126                         | -8.779101° | -77.217443° | 1548.3                                    | 24.5           | 678.0            | 178.5           | 117.3           | 806.2                         | 1594.9           | 3052.7 | 0.27 | 601  | 7.68 | 424.0        | 7.79     | -14.25         | -106.22    |                |  |               |  |
| 7/20/15   | Huaylas tributary                                              | 1870                 | 59                  | Alpine                  | <sup>b</sup> Not calculated | -8.771704° | -77.221419° | 2266.5                                    | 28.3           | 1200.1           | 153.0           | 23.6            | 1012.3                        | 2628.1           | 5202.6 | 0.10 | 930  | 7.79 | 364.8        | 7.07     | -13.53         | -101.20    |                |  |               |  |
| 7/21/15   | Downstream Huaylas, upstream Rupac                             | 1741                 | 101                 | Alpine                  | <sup>b</sup> Not calculated | -8.511584° | -77.359443° | 1748.8                                    | 24.4           | 769.1            | 284.8           | 210.6           | 983.8                         | 1669.9           | 3175.3 | 0.31 | 717  | 7.78 | 299.2        | 7.3      | -14.04         | -105.03    |                |  |               |  |
| 7/21/15   | Rupac tributary                                                | 1750                 | 102                 | Alpine                  | 15                          | -8.508563° | -77.366396° | 3206.2                                    | 48.9           | 1557.0           | 404.6           | 199.9           | 2367.7                        | 2613.0           | 4685.6 | 0.41 | 1323 | 7.96 | 564.9        | 6.06     | -13.18         | -99.41     |                |  |               |  |
| 7/22/15   | Downstream Rupac, upstream Actuy                               | 1602                 | 131                 | Alpine                  | 162                         | -8.321838° | -77.473847° | 1831.4                                    | 26.9           | 833.2            | 298.7           | 216.3           | 1109.9                        | 1797.6           | 3360.8 | 0.52 | 758  | 7.70 | 324.8        | 6.93     | -13.91         | -104.37    |                |  |               |  |
| 7/22/15   | Actuy tributary                                                | 1605                 | 132                 | Alpine                  | 19                          | -8.318808° | -77.475659° | 3076.0                                    | 56.5           | 1778.6           | 530.4           | 487.2           | 2039.2                        | 2769.7           | 3890.7 | 0.35 | 1300 | 8.04 | 586.6        | 7.36     | -13.25         | -98.65     |                |  |               |  |
| 7/23/15   | Downstream Actuy, upstream Cajas                               | 1612                 | 138                 | Alpine                  | 177                         | -8.275496° | -77.504101° | 1956.0                                    | 29.0           | 884.0            | 316.8           | 239.7           | 1227.7                        | 1865.5           | 3357.4 | 0.35 | 818  | 7.79 | 342.8        | 6.89     | -13.90         | -104.34    |                |  |               |  |
| 7/23/15   | Cajas tributary                                                | 1582                 | 138.5               | Alpine                  | 21                          | -8.272440° | -77.505267° | 2135.6                                    | 22.9           | 1040.9           | 323.6           | 57.6            | 851.6                         | 2666.4           | 4480.9 | 0.32 | 904  | 7.83 | 357.6        | 7.21     | -12.48         | -92.61     |                |  |               |  |
| 7/27/15   | Downstream Cajas, upstream San Miguel                          | 1256                 | 200                 | Alpine                  | 196                         | -7.885920° | -77.634223° | 2009.9                                    | 31.5           | 953.5            | 340.6           | 217.6           | 1221.2                        | 2883.5           | 3555.2 | 0.36 | 839  | 7.84 | 350.0        | 7.02     | -13.70         | -102.60    |                |  |               |  |
| 7/27/15   | San Miguel tributary                                           | 1272                 | 201                 | Alpine                  | 39                          | -7.882844° | -77.629097° | 2052.9                                    | 27.2           | 650.3            | 356.5           | 42.5            | 1504.6                        | QNS <sup>a</sup> | 4534.1 | 0.77 | 849  | 7.52 | 325.5        | 7.95     | -12.31         | -90.49     |                |  |               |  |
| 7/30/15   | Downstream San Miguel, upstream Chusgon                        | 1093                 | 256.5               | Transition              | 235                         | -7.485927° | -77.743442° | 2114.4                                    | 32.9           | 966.3            | 349.3           | 204.2           | 1353.6                        | 1973.1           | 3710.5 | 0.38 | 869  | 7.78 | 364.4        | 6.98     | -13.44         | -100.55    |                |  |               |  |
| 7/30/15   | Chusgon tributary                                              | 1082                 | 257                 | Transition              | 23                          | -7.479037° | -77.751896° | 2575.5                                    | 40.5           | 1352.6           | 401.1           | 262.4           | 1341.9                        | 1861.1           | 4500.3 | 0.51 | 1067 | 7.99 | 437.6        | 7.28     | -11.91         | -88.13     |                |  |               |  |
| 8/1/15    | Downstream Chusgon, upstream Cresnejas                         | 1047                 | 277                 | Transition              | 258                         | -7.366996° | -77.822635° | 2184.6                                    | 34.0           | 985.4            | 355.9           | 202.2           | 1467.9                        | 2033.9           | 3841.6 | 0.29 | 873  | 7.81 | 377.6        | 6.96     | -13.25         | -99.04     |                |  |               |  |
| 8/1/15    | Cresnejas tributary                                            | 1040                 | 278                 | Transition              | 18                          | -7.347826° | -77.833402° | 3371.1                                    | 82.4           | 2017.5           | 710.0           | 362.4           | 2497.0                        | 2902.2           | 6165.0 | 0.81 | 1444 | 8.06 | 653.1        | 5.63     | -10.98         | -82.19     |                |  |               |  |
| 8/6/15    | Downstream Cresnejas, upstream Yangas                          | 761                  | 395                 | Transition              | 275                         | -6.609696° | -78.114522° | 2302.1                                    | 35.8           | 1055.6           | 373.7           | 214.4           | 1487.7                        | 2263.9           | 4016.1 | 0.37 | 936  | 7.94 | 412.8        | 6.61     | -12.59         | -94.12     |                |  |               |  |
| 8/6/15    | Yangas tributary                                               | 769                  | 396                 | Transition              | 25                          | -6.603928° | -78.118031° | 2721.9                                    | 50.0           | 901.5            | 655.6           | 513.2           | 875.2                         | 3033.2           | 5812.2 | 0.55 | 1147 | 7.98 | 452.5        | 8.89     | -10.31         | -73.61     |                |  |               |  |
| 8/8/15    | Downstream Yangas, upstream Shuve                              | 710                  | 424                 | Transition              | 300                         | -6.458188° | -78.199172° | 2307.0                                    | 37.0           | 1047.5           | 381.5           | 214.0           | 1366.9                        | 2284.0           | 4149.4 | 0.35 | 970  | 7.72 | 406.8        | 6.98     | -12.46         | -92.73     |                |  |               |  |
| 8/8/15    | Shuve tributary                                                | 708                  | 425                 | Transition              | 28                          | -6.455567° | -78.206824° | 1109.1                                    | 30.5           | 1265.7           | 376.4           | 45.9            | 534.9                         | 2270.7           | 7449.9 | 0.32 | 464  | 7.76 | 273.3        | 11.64    | -8.60          | -57.15     |                |  |               |  |
| 8/11/15   | Downstream Shuve, upstream Silaco                              | 537                  | 487                 | Transition              | 328                         | -6.087641° | -78.505627° | 2206.6                                    | 36.9           | 1050.5           | 380.5           | 211.1           | 1329.6                        | 2170.1           | 4439.1 | 0.31 | 934  | 7.91 | 384.8        | 7.48     | -11.89         | -87.63     |                |  |               |  |
| 8/11/15   | Silaco tributary                                               | 531                  | 488                 | Transition              | 48                          | -6.087924° | -78.508466° | 2923.9                                    | 36.7           | 831.0            | 339.2           | 200.0           | 1316.6                        | 3529.6           | 4487.3 | 0.53 | 1212 | 7.93 | 438.0        | 10.34    | -8.80          | -60.06     |                |  |               |  |
| 8/12/15   | Downstream Silaco, upstream Chamaya                            | 431                  | 538.5               | Jungle                  | 376                         | -5.798495° | -78.705474° | 2266.2                                    | 35.8           | 1011.2           | 379.4           | 272.3           | 1325.2                        | 2265.9           | 4544.3 | 0.39 | 999  | 7.93 | 396.4        | 7.91     | -11.40         | -83.28     |                |  |               |  |
| 8/12/15   | Chamaya tributary                                              | 425                  | 539                 | Jungle                  | 173                         | -5.785582° | -78.704206° | 1508.5                                    | 23.3           | 308.4            | 242.5           | 38.3            | 345.9                         | 1782.1           | 6794.2 | 1.13 | 746  | 7.56 | 203.4        | 14.34    | -7.62          | -46.66     |                |  |               |  |
| 8/13/15   | Downstream Chamaya, upstream Chinchipe                         | 364                  | 582                 | Jungle                  | 549                         | -5.535121° | -78.563920° | 1795.8                                    | 30.2           | 689.2            | 313.7           | 157.5           | 890.5                         | QNS <sup>a</sup> | 5109.7 | 0.63 | 760  | 7.66 | 293.7        | 10.67    | -9.63          | -66.40     |                |  |               |  |
| 8/13/15   | Chinchipe tributary                                            | 353                  | 583                 | Jungle                  | 366                         | -5.516203° | -78.553260° | 525.7                                     | 20.5           | 129.5            | 108.6           | 15.9            | 94.4                          | 686.0            | 4357.6 | 0.82 | 236  | 7.33 | 80.0         | 16.05    | -6.16          | -33.22     |                |  |               |  |
| 8/14/15   | Downstream Chinchipe at Montenegro                             | 326                  | 618                 | Jungle                  | 915                         | -5.311663° | -78.431333° | 925.8                                     | 23.9           | 291.3            | 204.8           | 73.5            | 358.2                         | 1067.3           | 5109.8 | 0.87 | 417  | 7.43 | 150.6        | 14.18    | -7.41          | -45.11     |                |  |               |  |
| 7/29/15   | Not an end member, mainstem downstream Vijus mine waste outlet | 1165                 | 225                 | Alpine                  |                             | -7.721448° | -77.667828° | 1998.7                                    | 32.5           | 940.9            | 335.0           | 215.1           | 1318.3                        | 1942.0           | 3645.1 | 0.32 | 841  | 7.88 | 367.6        | 7.02     | -13.47         | -100.70    |                |  |               |  |
| 8/8/15    | Not an end member, Magdalena creek, tufa stream                | 638                  | 437                 | Transition              |                             | -6.389930° | -78.281343° | 3289.2                                    | 160.3          | 2540.0           | 1878.4          | 1549.0          | 3626.3                        | 2681.1           | 5592.6 | 1.11 | 1355 | 7.87 | 883.0        | 8.44     | -7.82          | -54.13     |                |  |               |  |
| 8/9/15    | Not an end member, right bank tributary, Conjun River          | 540                  | 458                 | Transition              |                             | -6.266168° | -78.369008° | 1128.1                                    | 19.1           | 600.0            | 206.0           | 28.5            | 305.1                         | 1659.9           | 7751.8 | 0.19 | 491  | 7.70 | 192.8        | 12.54    | -8.44          | -54.96     |                |  |               |  |

<sup>a</sup>QNS = Sample quantity not sufficient for analysis.

<sup>b</sup>Not calculated due to anomalous inputs observed in vicinity of Huaylas tributary
